# Supplementary material for: Using a Case-Mix System to Identify Long-Term Care Needs Among Discharged Cancer Patients: A Retrospective Study from Taiwan
Source: Research Square preprint supplement (doi:10.21203/rs.3.rs-8620793/v1), 2026-02-16
Supplement: Supplementary file 1 [file cd3dcdd5b5d74640fbea2508.docx]

**Supplementary Table 1. Distribution of Cancer Diagnosis Categories Among Patients Applying for Long-Term Care Services**

| **Diagnosis Category** | **Number of Cases** | **Percentage** |
| --- | --- | --- |
| Hepatobiliary & Pancreas | 17 | 22.7% |
| Lower Digestive Tract | 14 | 18.7% |
| Head and Neck | 9 | 12.0% |
| Respiratory Tract | 8 | 10.7% |
| Upper Digestive Tract | 7 | 9.3% |
| Breast | 6 | 8.0% |
| Prostate | 4 | 5.3% |
| Urinary Tract | 4 | 5.3% |
| Hematologic & Lymphatic | 4 | 5.3% |
| Nervous System | 2 | 2.7% |
